# Supplementary material for: Dual fluorescence of excited state intra-molecular proton transfer of HBFO: mechanistic understanding, substituent and solvent effects
Source: Royal Society of Chemistry journal article supplement (doi:10.1039/c3cp54462a), 2014-01-01
Supplement: c3cp54462a.pdf [file c3cp54462a.pdf]

**Electronic Supplementary Information**

*for*

**Dual Fluorescence of Excited State Intra-molecular Proton  
Transfer of HBFO: Mechanistic Understanding, Substituent  
and Solvent Effects**

*Wenjing Yang and Xuebo Chen\**

*Key Laboratory of Theoretical and Computational Photochemistry, Ministry of  
Education*

*Department of Chemistry, Beijing Normal University, Xin-wai-da-jie 19, Beijing  
100875, People's Republic of China*

Email: [xuebochen@bnu.edu.cn](mailto:xuebochen@bnu.edu.cn)

## Section 1, Computational method for rate calculation.

Without consideration of rotational degrees of freedom, the standard expression\* for the unimolecular rate constant (units  $s^{-1}$ ) of an isolated molecule with total energy  $E$

$$k(E) = \frac{N(E)}{2\pi\hbar N_0(E)} \quad (S1)$$

Within the separable approximation tunneling is accounted for by replacing  $N(E)$  in eq S1 by  $N_{QM}(E)$

$$N_{QM}(E) = \sum_n P(E - \varepsilon_n^\ddagger) \quad (S2)$$

The expression for the unimolecular rate constant which include the effect of tunneling is

$$k(E) = \frac{\sum_n P(E - \varepsilon_n^\ddagger)}{2\pi\hbar N_0'(E)} \quad (S3)$$

Where  $N(E)$  and  $N_0(E)$  are the integral densities of states of the transition state and the reactant molecule. The expressions of them are as follows:

$$N(E) = \sum_n h(E - \varepsilon_n^\ddagger) \quad (S4)$$

$$N_0(E) = \sum_n h(E - \varepsilon_n) \quad (S5)$$

Where  $h(x)$  is the usual step-function

$$h(x) = \begin{cases} 0, & x < 0 \\ 1, & x > 0 \end{cases} \quad (S6)$$

And  $\varepsilon_n^\ddagger$  and  $\varepsilon_n$  are the vibrational energy levels of the transition state and the reactant molecule. It is generally to assume the vibrational energy levels are almost given by an oscillator approximation, so the expression can be obtained as follows:

$$\varepsilon_n = \sum_{i=1}^s \hbar\omega_i \left(n_i + \frac{1}{2}\right) \quad (S7)$$

$$\varepsilon_n^\ddagger = V_0 + \sum_{i=1}^{s-1} \hbar\omega_i^\ddagger \left(n_i + \frac{1}{2}\right) \quad (S8)$$

Where  $s$  is the number of vibrational degrees of freedom of the stable molecule,  $\{\omega_i\}$  and  $\{\omega_i^\ddagger\}$  are the normal mode vibration frequencies for the transition state and for the reactant molecule, respectively. And  $V_0$  is the energy of the saddle point of the PES relative to the minimum PES of the reactant molecule, the total energy  $E$  is based on the relative energy compares to the minimum of the PES.

Next the large sums of the densities of states would be disposed approximately. So the expressions are shown below:

$$N_0(E) = \frac{E^s}{s! \sum_{i=1}^s (\hbar \omega_i)} \quad (\text{S9})$$

$$N(E) = \frac{(E - V_0)^{s-1}}{(s-1)! \sum_{i=1}^{s-1} (\hbar \omega_i^\ddagger)} \quad (\text{S10})$$

On the basis of above approximates, the expression of the rate constant can be expressed as follow.

$$k(E) = A \left( \frac{E - V_0}{E} \right)^{s-1} \quad (\text{S11})$$

where  $A$  is a frequency factor (units  $\text{s}^{-1}$ ).

$$A = \frac{\left[ \prod_{i=1}^s \omega_i \right]}{2\pi \left[ \prod_{i=1}^{s-1} \omega_i^\ddagger \right]} \quad (\text{S12})$$

The unit conversion from  $\text{cm}^{-1}$  for normal mode vibration frequencies and frequency factor  $A$  to rate unit  $\text{s}^{-1}$  is taken by using the following formula

$$c = \frac{\nu}{\tilde{\nu}} \quad (\text{S13})$$

Where  $\nu$  is the unimolecular vibration frequencies,  $\tilde{\nu}$  is the wave number and  $c$  is the velocity of light.

Therefore, the expression of frequency factor can be written as follows:

$$A = \frac{\left[ \prod_{i=1}^s \omega_i \right] \times (3 \times 10^{10})}{2\pi \left[ \prod_{i=1}^{s-1} \omega_i^\ddagger \right]} \quad (\text{S14})$$

So finally the expression of unimolecular rate constant can be expressed as:

$$k(E) = \frac{\left[ \prod_{i=1}^s \omega_i \right] \times (3 \times 10^{10})}{2\pi \left[ \prod_{i=1}^{s-1} \omega_i^\ddagger \right]} \left( \frac{E - V_0}{E} \right)^{s-1} \quad (\text{S15})$$

**Section 2, Test calculations for the choice of most appropriate active space of HBFO at the CASSCF/CASPT2 level of theory.**

**Test 1:**

|                                                                      |               |               |               |               |               |  |  |  |
|----------------------------------------------------------------------|---------------|---------------|---------------|---------------|---------------|--|--|--|
| The vertical excitation energy: 3.31 eV (experimental value:3.03 eV) |               |               |               |               |               |  |  |  |
| The diagram of orbitals in active space cas(10,9)                    |               |               |               |               |               |  |  |  |
|                                                                      |               |               |               |               |               |  |  |  |
| Occupation numbers of these orbitals                                 |               |               |               |               |               |  |  |  |
|                                                                      | 1             | 2             | 3             | 4             | 5             |  |  |  |
| 1                                                                    | 0.199988D+01  |               |               |               |               |  |  |  |
| 2                                                                    | 0.321563D-04  | 0.199989D+01  |               |               |               |  |  |  |
| 3                                                                    | -0.973261D-07 | 0.110158D-05  | 0.198126D+01  |               |               |  |  |  |
| 4                                                                    | -0.228208D-04 | 0.110198D-05  | 0.196043D-05  | 0.195996D+01  |               |  |  |  |
| 5                                                                    | 0.103917D-04  | 0.114739D-05  | -0.713624D-06 | -0.233188D-05 | 0.193523D+01  |  |  |  |
| 6                                                                    | 0.582563D-04  | 0.101117D-04  | 0.300263D-06  | 0.333791D-03  | -0.136028D-03 |  |  |  |
| 7                                                                    | 0.540031D-07  | 0.309784D-04  | 0.154174D-04  | 0.581731D-06  | -0.314053D-06 |  |  |  |
| 8                                                                    | 0.379016D-04  | -0.443733D-04 | 0.399573D-06  | -0.205618D-03 | 0.741175D-04  |  |  |  |
| 9                                                                    | 0.513347D-05  | 0.270888D-05  | -0.684411D-05 | -0.163345D-02 | 0.487065D-03  |  |  |  |
|                                                                      | 6             | 7             | 8             | 9             |               |  |  |  |
| 6                                                                    | 0.638849D-01  |               |               |               |               |  |  |  |
| 7                                                                    | 0.596630D-07  | 0.187869D-01  |               |               |               |  |  |  |
| 8                                                                    | 0.991337D-05  | 0.551403D-06  | 0.345485D-01  |               |               |  |  |  |
| 9                                                                    | -0.640363D-05 | -0.299211D-06 | 0.227016D-03  | 0.655915D-02  |               |  |  |  |

## Test 2

The vertical excitation energy: 3.97 eV (experimental value:3.03 eV)

The diagram of orbitals in active space cas(10,9)

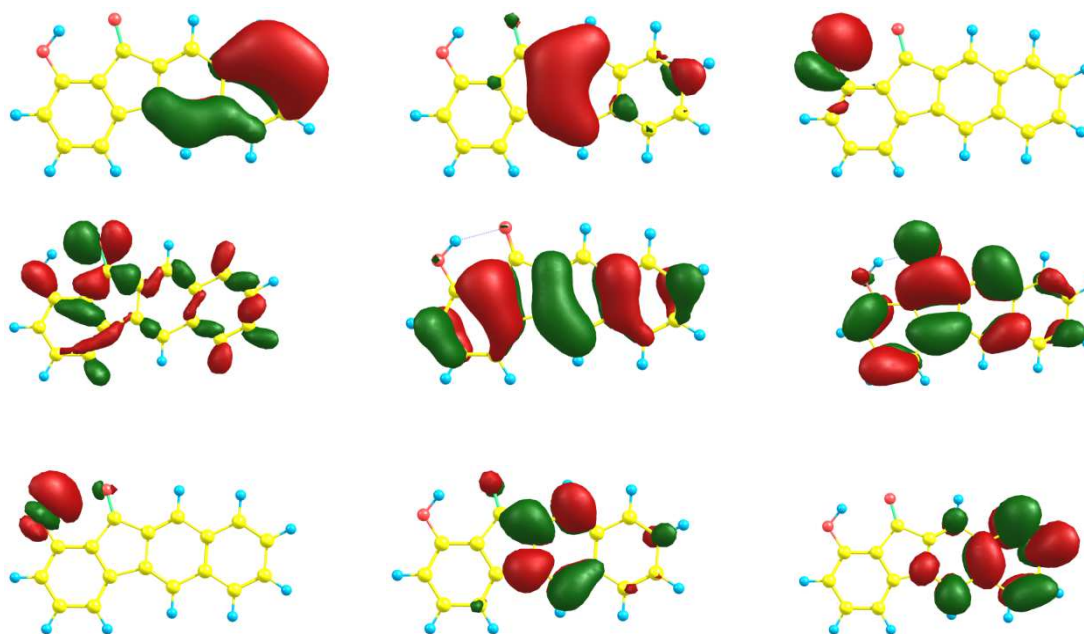

Occupation numbers of these orbitals

|   | 1             | 2             | 3             | 4             | 5             |
|---|---------------|---------------|---------------|---------------|---------------|
| 1 | 0.194855D+01  |               |               |               |               |
| 2 | -0.156944D-05 | 0.194250D+01  |               |               |               |
| 3 | -0.882271D-06 | -0.112541D-05 | 0.198138D+01  |               |               |
| 4 | -0.169157D-06 | -0.841250D-07 | -0.143827D-05 | 0.199998D+01  |               |
| 5 | 0.948764D-06  | 0.153291D-07  | -0.435568D-06 | -0.486922D-06 | 0.191001D+01  |
| 6 | 0.594017D-06  | 0.327197D-04  | 0.726153D-06  | -0.688234D-05 | -0.292908D-05 |
| 7 | -0.490469D-05 | 0.331468D-05  | 0.171414D-04  | -0.336908D-05 | -0.110051D-04 |
| 8 | -0.100885D-04 | -0.225938D-04 | 0.355710D-05  | 0.176116D-04  | -0.253944D-06 |
| 9 | -0.859608D-05 | -0.145292D-04 | -0.326979D-05 | 0.146717D-05  | 0.190099D-04  |
|   | 6             | 7             | 8             | 9             |               |
| 6 | 0.910035D-01  |               |               |               |               |
| 7 | 0.129763D-05  | 0.186236D-01  |               |               |               |
| 8 | -0.128525D-05 | 0.380035D-06  | 0.578989D-01  |               |               |
| 9 | -0.182043D-05 | 0.151963D-06  | -0.282292D-07 | 0.500622D-01  |               |

### Test 3

The vertical excitation energy: 3.88 eV (experimental value:3.03 eV)

The diagram of orbitals in active space cas(10,8)

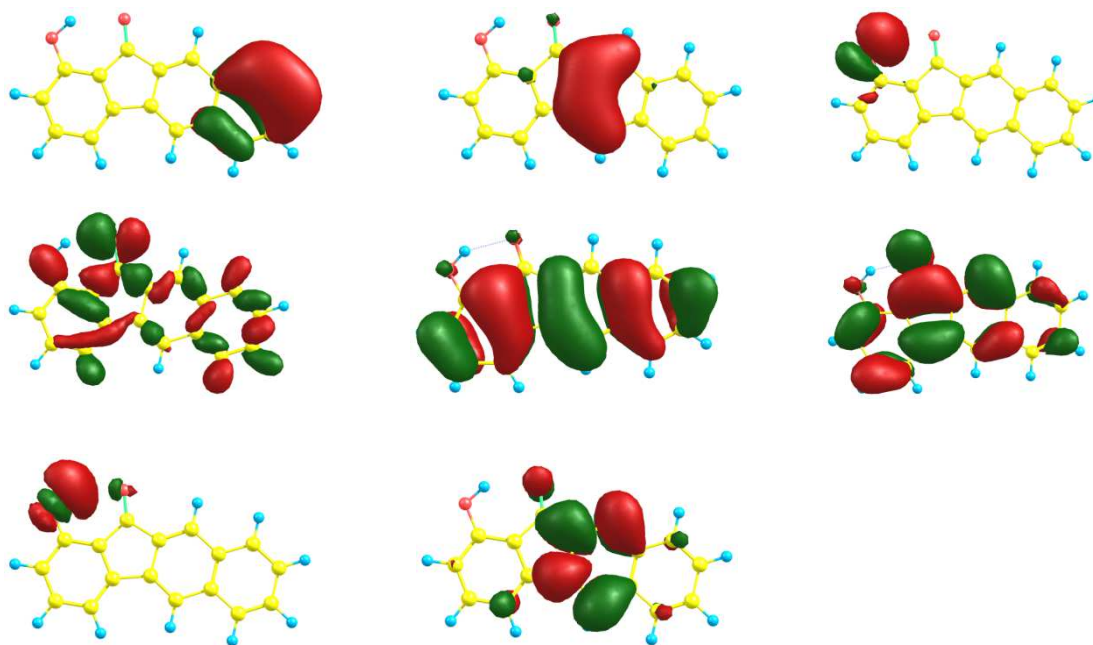

Occupation numbers of these orbitals

|   | 1             | 2             | 3             | 4             | 5             |
|---|---------------|---------------|---------------|---------------|---------------|
| 1 | 0.199992D+01  |               |               |               |               |
| 2 | 0.160922D-04  | 0.194282D+01  |               |               |               |
| 3 | 0.324397D-07  | -0.238688D-07 | 0.198139D+01  |               |               |
| 4 | 0.364109D-04  | -0.577274D-05 | -0.323699D-07 | 0.199998D+01  |               |
| 5 | 0.150811D-04  | 0.175093D-04  | -0.403405D-07 | -0.166140D-05 | 0.191277D+01  |
| 6 | -0.302331D-03 | -0.767787D-03 | -0.997503D-06 | 0.255324D-04  | -0.247269D-04 |
| 7 | -0.121878D-05 | -0.898377D-06 | -0.114098D-05 | -0.318771D-05 | 0.590908D-06  |
| 8 | 0.515718D-03  | 0.215390D-03  | 0.190969D-05  | -0.126049D-04 | -0.871742D-03 |
|   | 6             | 7             | 8             |               |               |
| 6 | 0.867646D-01  |               |               |               |               |
| 7 | -0.151916D-06 | 0.186215D-01  |               |               |               |
| 8 | 0.198506D-04  | 0.116806D-06  | 0.577370D-01  |               |               |

Section 3, Figures

Figure S1. The diagram of selected orbitals in active space for HBFO.

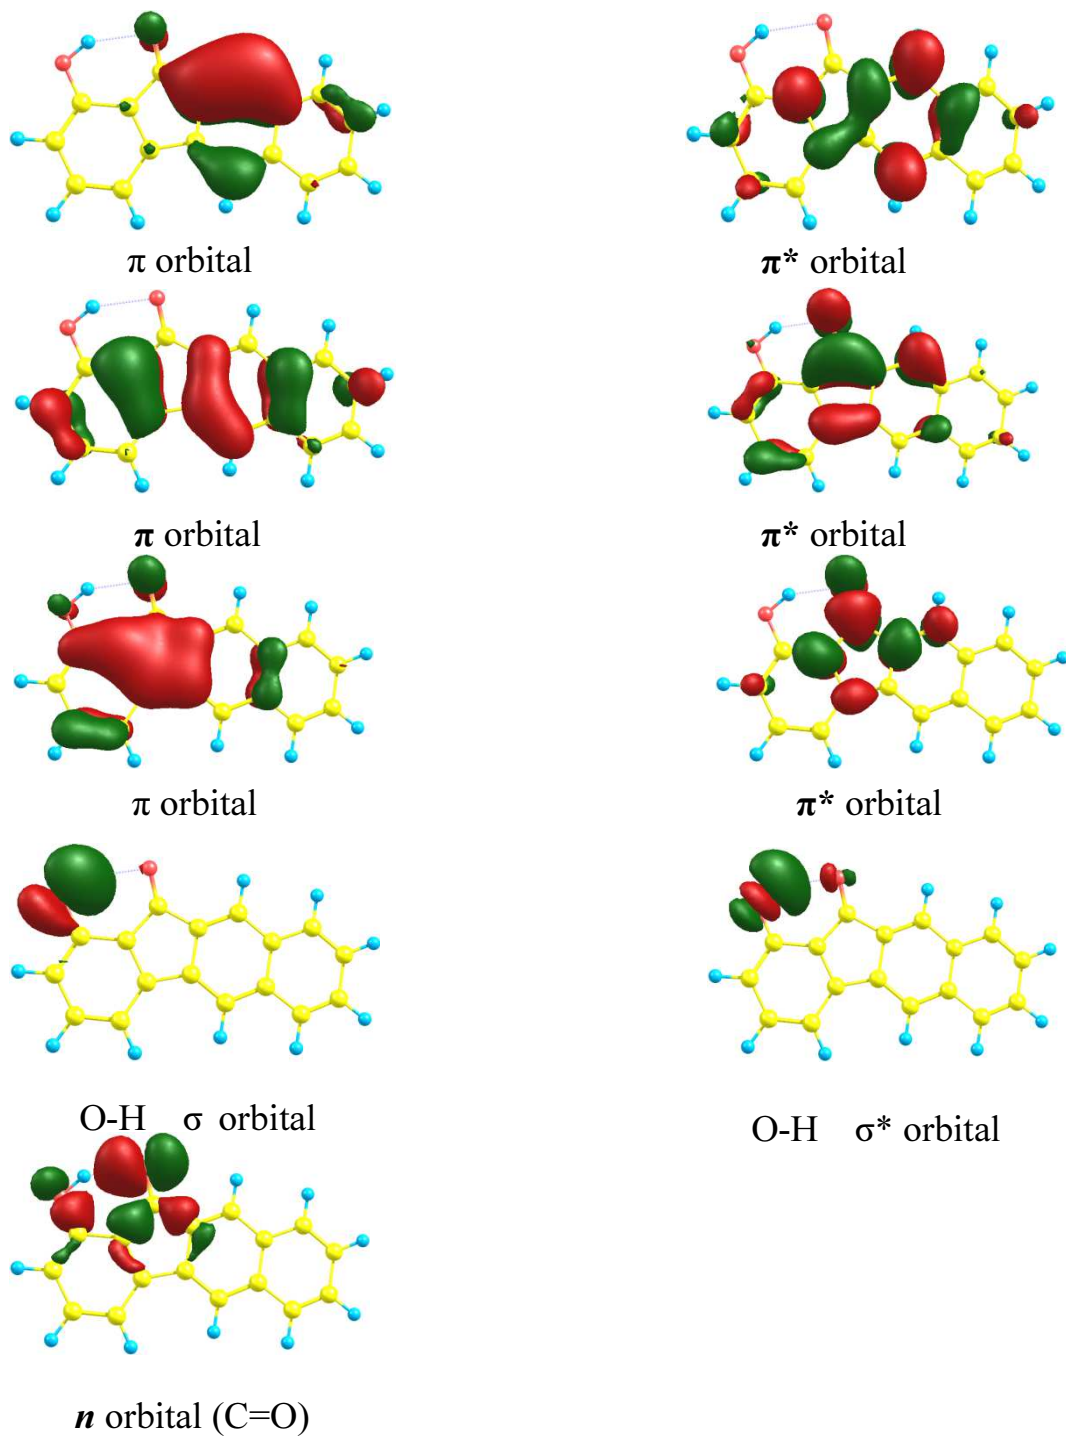



Figure S2. The diagram of selected orbitals in active space for *meta*-CF<sub>3</sub>-HBFO.

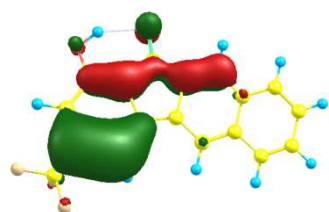

$\pi$  orbital

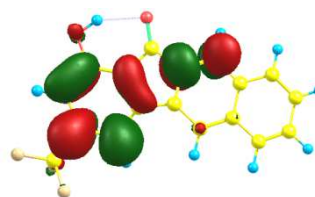

$\pi^*$  orbital

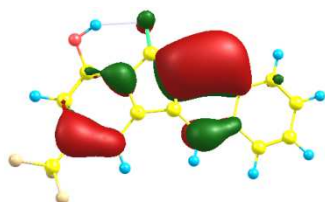

$\pi$  orbital

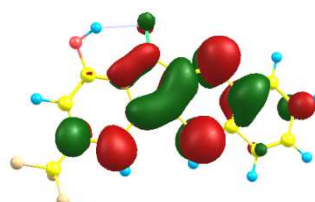

$\pi^*$  orbital

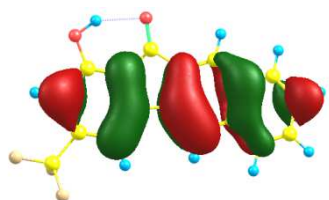

$\pi$  orbital

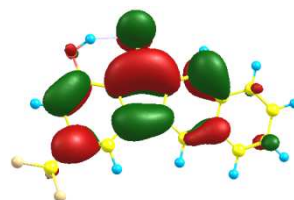

$\pi^*$  orbital

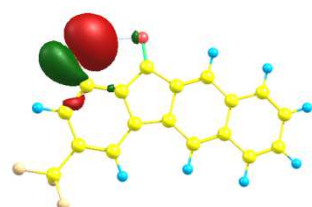

O-H  $\sigma$  orbital

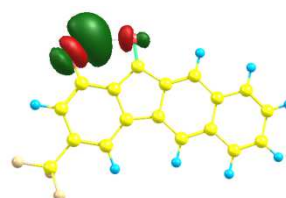

O-H  $\sigma^*$  orbital

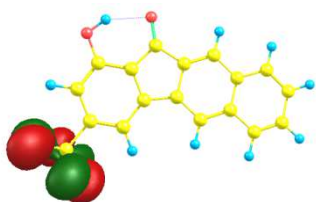

$n$  orbital (F)

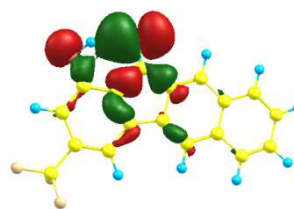

$n$  orbital (C=O)

Figure S3. The diagram of selected orbitals in active space for *meta*-NH<sub>2</sub>-HBFO.

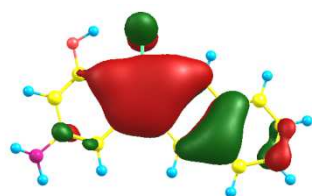

$\pi$  orbital

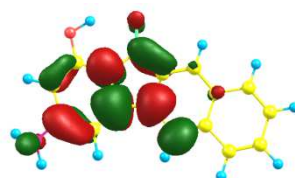

$\pi^*$  orbital

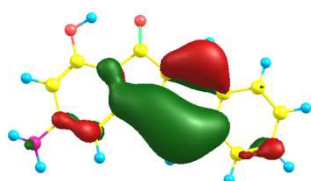

$\pi$  orbital

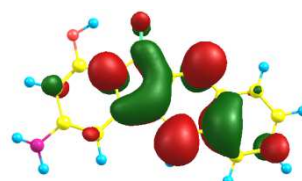

$\pi^*$  orbital

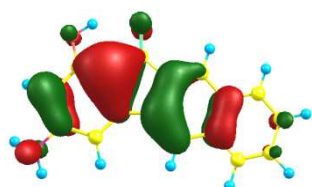

$\pi$  orbital

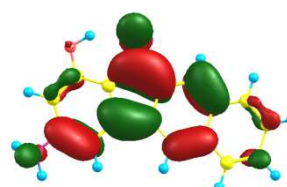

$\pi^*$  orbital

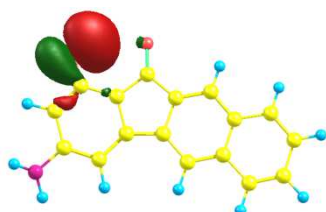

O-H  $\sigma$  orbital

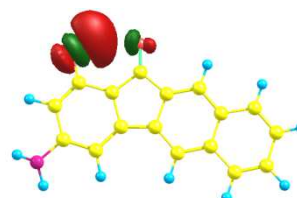

O-H  $\sigma^*$  orbital

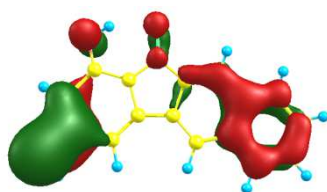

$n$  orbital (N)

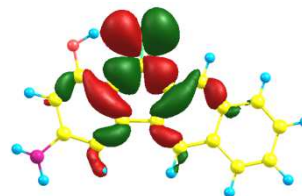

$n$  orbital (C=O)

### Section 4, Tables

**Table S1** The vertical excitation energies ( $E_{\perp}$ , eV), wavelengths ( $\lambda_{\text{cal}}$ , nm), experimental wavelength ( $\lambda_{\text{exp}}$ , nm), oscillator strengths ( $f$ ), dipole moments (D.M., Debye) and the character of singly occupied orbitals in the  $S_{\text{CT}}(^1\pi\pi^*)$  state for the Franck-Condon structures of HBFO at the CASPT2//CAS(10,9)/6-31G\* and for *meta*-CF<sub>3</sub>-HBFO, *meta*-NH<sub>2</sub>-HBFO, *para*-CF<sub>3</sub>-HBFO, *para*-NH<sub>2</sub>-HBFO at the CASPT2//CAS(12,10)/6-31G\* level of theory

| Fluorescers                        | Singly occupied orbitals                                                            | D.M. | $f$      | $E_{\perp}$ | $\lambda_{\text{cal}}$ | $\lambda_{\text{exp}}$ |
|------------------------------------|-------------------------------------------------------------------------------------|------|----------|-------------|------------------------|------------------------|
| HBFO                               | 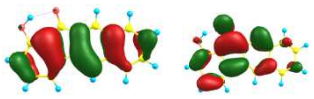   | 6.21 | 2.51E-02 | 3.13        | 395                    | 409                    |
| <i>meta</i> -CF <sub>3</sub> -HBFO |    | 5.55 | 1.53E-01 | 3.31        | 375                    |                        |
| <i>meta</i> -NH <sub>2</sub> -HBFO |    | 6.20 | 2.58E-01 | 3.43        | 361                    |                        |
| <i>para</i> -CF <sub>3</sub> -HBFO |   | 4.56 | 1.55E-01 | 3.36        | 368                    |                        |
| <i>para</i> -NH <sub>2</sub> -HBFO |  | 6.23 | 2.59E-01 | 3.47        | 357                    |                        |

**Table S2** The absolute energy (A.E.) in Hartree for the optimized structures of enol (E)/keto(K) forms and maxima of five fluorescers, HBFO, *meta*-CF<sub>3</sub>-HBFO, *meta*-NH<sub>2</sub>-HBFO, *para*-CF<sub>3</sub>-HBFO, *para*-NH<sub>2</sub>-HBFO in gas phase, cyclohexane and acetonitrile solvents along ESIPT pathways in the  $S_{\text{CT}}(^1\pi\pi^*)$  state obtained at CASPT2//CASSCF/6-31+G\* or CASPT2//CASSCF/PCM/6-31+G\* level of theory

| fluorescers | Solvents     | critical points                     | A.E.      |
|-------------|--------------|-------------------------------------|-----------|
| HBFO        | Gas          | $S_{\text{CT}}\text{-E}$            | -801.7735 |
|             |              | $S_{\text{CT}}\text{-1.26-maximum}$ | -801.7570 |
|             |              | $S_{\text{CT}}\text{-K}$            | -801.7692 |
|             | Cyclohexane  | $S_{\text{CT}}\text{-E}$            | -801.7797 |
|             |              | $S_{\text{CT}}\text{-1.26-maximum}$ | -801.7627 |
|             |              | $S_{\text{CT}}\text{-K}$            | -801.7760 |
|             | Acetonitrile | $S_{\text{CT}}\text{-E}$            | -801.7907 |
|             |              | $S_{\text{CT}}\text{-1.26-maximum}$ | -801.7744 |
|             |              | $S_{\text{CT}}\text{-K}$            | -801.7873 |

|                                        |              |                               |            |
|----------------------------------------|--------------|-------------------------------|------------|
| <i>meta</i> -CF <sub>3</sub><br>-HBFO  | Gas          | S <sub>CT</sub> -E            | -1138.0648 |
|                                        |              | S <sub>CT</sub> -1.20-maximum | -1138.0575 |
|                                        |              | S <sub>CT</sub> -K            | -1138.0666 |
|                                        | Cyclohexane  | S <sub>CT</sub> -E            | -1137.9960 |
|                                        |              | S <sub>CT</sub> -1.20-maximum | -1137.9882 |
|                                        |              | S <sub>CT</sub> -K            | -1137.9918 |
|                                        | Acetonitrile | S <sub>CT</sub> -E            | -1137.9960 |
|                                        |              | S <sub>CT</sub> -1.20-maximum | -1137.9785 |
|                                        |              | S <sub>CT</sub> -K            | -1137.9903 |
| <i>meta</i> -NH <sub>2</sub><br>-HBFO  | Gas          | S <sub>CT</sub> -E            | -856.9698  |
|                                        |              | S <sub>CT</sub> -1.28-maximum | -856.9464  |
|                                        |              | S <sub>CT</sub> -K            | -856.9596  |
|                                        | Cyclohexane  | S <sub>CT</sub> -E            | -856.9848  |
|                                        |              | S <sub>CT</sub> -1.28-maximum | -856.9683  |
|                                        |              | S <sub>CT</sub> -K            | -856.9737  |
|                                        | Acetonitrile | S <sub>CT</sub> -E            | -857.0001  |
|                                        |              | S <sub>CT</sub> -1.28-maximum | -856.9754  |
|                                        |              | S <sub>CT</sub> -K            | -856.9932  |
| <i>para</i> -CF <sub>3</sub><br>-HBFO  | Gas          | S <sub>CT</sub> -E            | -1137.9748 |
|                                        |              | S <sub>CT</sub> -1.22-maximum | -1137.9616 |
|                                        |              | S <sub>CT</sub> -K            | -1137.9746 |
|                                        | Cyclohexane  | S <sub>CT</sub> -E            | -1137.9830 |
|                                        |              | S <sub>CT</sub> -1.22-maximum | -1137.9704 |
|                                        |              | S <sub>CT</sub> -K            | -1137.9766 |
|                                        | Acetonitrile | S <sub>CT</sub> -E            | -1137.9920 |
|                                        |              | S <sub>CT</sub> -1.22-maximum | -1137.9746 |
|                                        |              | S <sub>CT</sub> -K            | -1137.9882 |
| <i>para</i> -NH <sub>2</sub> -<br>HBFO | Gas          | S <sub>CT</sub> -E            | -856.9847  |
|                                        |              | S <sub>CT</sub> -1.28-maximum | -856.9671  |
|                                        |              | S <sub>CT</sub> -K            | -856.9768  |
|                                        | Cyclohexane  | S <sub>CT</sub> -E            | -856.9946  |
|                                        |              | S <sub>CT</sub> -1.28-maximum | -856.9795  |
|                                        |              | S <sub>CT</sub> -K            | -856.9848  |
|                                        | Acetonitrile | S <sub>CT</sub> -E            | -857.0106  |
|                                        |              | S <sub>CT</sub> -1.28-maximum | -856.9923  |
|                                        |              | S <sub>CT</sub> -K            | -857.0037  |

**Table S3** The comparisons between transition states (maxima) structure and the absolute energy (A.E.) in Hartree at CASPT2 level for HBFO, *meta*-CF<sub>3</sub>-HBFO, *meta*-NH<sub>2</sub>-HBFO in the S<sub>CT</sub>(<sup>1</sup>ππ\*) state are obtained by constraint geometry method and traditional TS optimizations, respectively.

|                                    | Constraint method                                                                                    | TS optimization                                                                                       |
|------------------------------------|------------------------------------------------------------------------------------------------------|-------------------------------------------------------------------------------------------------------|
| HBFO                               | 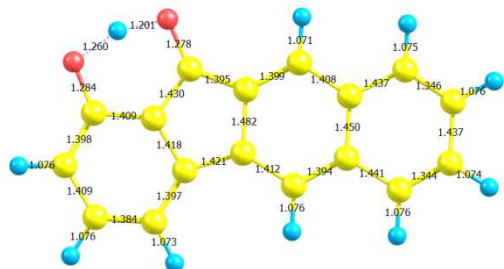 <p>-801.7071</p>   |  <p>-801.7070</p>   |
| <i>meta</i> -CF <sub>3</sub> -HBFO |  <p>-1137.9698</p> |  <p>-1137.9705</p> |
| <i>meta</i> -NH <sub>2</sub> -HBFO |  <p>-856.8901</p> |  <p>-856.8899</p> |

**Table S4** (a)The fragment of charge translocation from the moieties of naphthalene (Q1) to carbonyl group (Q2) and benzene (Q3) (b)The sum of Mulliken charge distribution of the different fragment upon  $S_0 \rightarrow S_{CT}(^1\pi\pi^*)$  FC excitation of HBFO.

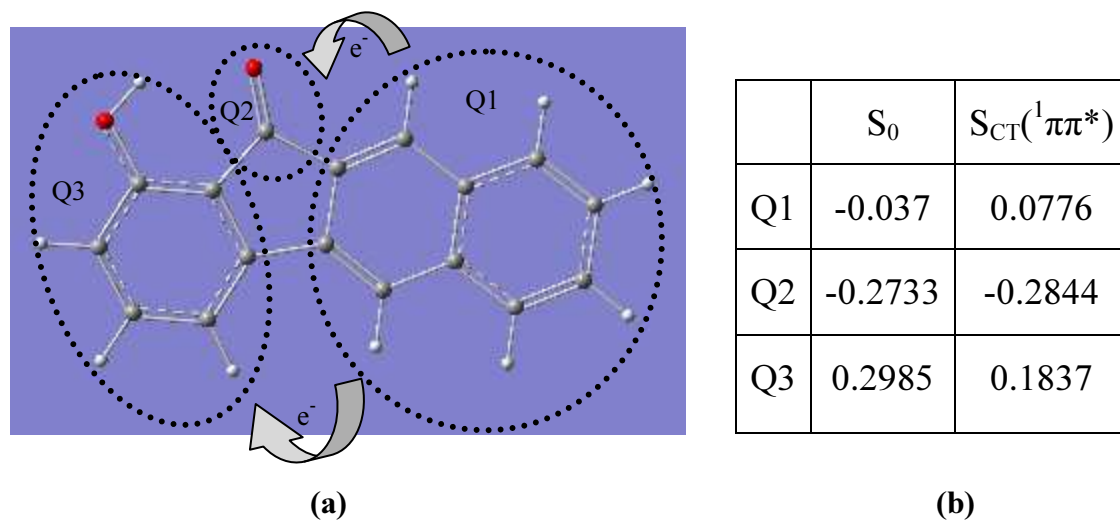

**Table S5** The test computations of single energy calculation at the CASPT2/6-31+G\* level of theory along the selective stationary points that are adjacent to maxima of HBFO, *meta*-CF<sub>3</sub>-HBFO and *meta*-NH<sub>2</sub>-HBFO to confirm the reliability of the maxima searching.

|                                    |                                     | <b>A.E.</b> | <b>R.E.</b> |
|------------------------------------|-------------------------------------|-------------|-------------|
| <b>HBFO</b>                        | <b>S<sub>CT</sub>-1.17</b>          | -801.7625   | 3.05        |
|                                    | <b>S<sub>CT</sub>-1.26(Barrier)</b> | -801.7570   | 3.21        |
|                                    | <b>S<sub>CT</sub>-1.36</b>          | -801.7577   | 3.18        |
| <i>meta</i> -CF <sub>3</sub> -HBFO | <b>S<sub>CT</sub>-1.17</b>          | -1138.0639  | 2.49        |
|                                    | <b>S<sub>CT</sub>-1.20(Barrier)</b> | -1138.0575  | 2.66        |
|                                    | <b>S<sub>CT</sub>-1.26</b>          | -1138.0640  | 2.48        |
| <i>meta</i> -NH <sub>2</sub> -HBFO | <b>S<sub>CT</sub>-1.23</b>          | -856.9515   | 3.27        |
|                                    | <b>S<sub>CT</sub>-1.28(Barrier)</b> | -856.9464   | 3.49        |
|                                    | <b>S<sub>CT</sub>-1.33</b>          | -856.9603   | 3.11        |

**Section 5-1, Cartesian coordinates of the optimized structures for HBFO along the ESIP reaction pathway in  $S_{CT}(^1\pi\pi^*)$  state at the CAS(10e/9o)/6-31G\* level of theory.**

**$S_{CT}(^1\pi\pi^*)-E$**

|   |              |              |              |
|---|--------------|--------------|--------------|
| 8 | -1.644070000 | -2.625807000 | -0.004356000 |
| 8 | -4.211458000 | -1.404652000 | 0.004905000  |
| 6 | -1.252869000 | -1.449187000 | 0.004568000  |
| 6 | 0.069292000  | -0.895611000 | 0.001163000  |
| 6 | 1.313285000  | -1.497418000 | -0.002803000 |
| 6 | 2.479491000  | -0.693948000 | -0.001244000 |
| 6 | 3.775334000  | -1.283186000 | -0.004259000 |
| 6 | 4.892712000  | -0.515811000 | -0.002252000 |
| 6 | 4.808734000  | 0.908897000  | 0.002890000  |
| 6 | 3.601873000  | 1.514281000  | 0.005474000  |
| 6 | 2.393648000  | 0.745916000  | 0.003656000  |
| 6 | 1.146785000  | 1.366072000  | 0.005769000  |
| 6 | -0.013889000 | 0.581335000  | 0.004031000  |
| 6 | -1.370507000 | 0.950634000  | 0.001738000  |
| 6 | -2.039929000 | 2.189259000  | -0.001158000 |
| 6 | -3.406966000 | 2.162073000  | -0.005070000 |
| 6 | -4.156878000 | 0.954347000  | -0.006424000 |
| 6 | -3.529383000 | -0.260259000 | -0.001937000 |
| 6 | -2.118493000 | -0.275463000 | 0.001077000  |
| 1 | -3.558766000 | -2.132211000 | 0.016147000  |
| 1 | 1.392104000  | -2.566766000 | -0.005444000 |
| 1 | 3.851213000  | -2.356107000 | -0.008045000 |
| 1 | 5.862236000  | -0.984089000 | -0.004345000 |
| 1 | 5.712337000  | 1.490270000  | 0.004428000  |
| 1 | 3.524806000  | 2.587717000  | 0.009049000  |
| 1 | 1.078735000  | 2.441849000  | 0.007539000  |
| 1 | -1.502397000 | 3.118492000  | -0.001242000 |
| 1 | -3.951868000 | 3.088037000  | -0.007479000 |
| 1 | -5.231216000 | 0.982241000  | -0.007971000 |

**$S_{CT}(^1\pi\pi^*)-1.26(\text{maximum})$**

|   |              |              |              |
|---|--------------|--------------|--------------|
| 8 | -1.765855000 | -2.527538000 | -0.002608000 |
| 8 | -3.974479000 | -1.548442000 | 0.004922000  |
| 6 | -1.253999000 | -1.356152000 | -0.005186000 |
| 6 | 0.051971000  | -0.864836000 | -0.006118000 |
| 6 | 1.307138000  | -1.483175000 | -0.002079000 |
| 6 | 2.474246000  | -0.695499000 | -0.000169000 |
| 6 | 3.779336000  | -1.297811000 | 0.004914000  |
| 6 | 4.893802000  | -0.542232000 | 0.007134000  |
| 6 | 4.813929000  | 0.892424000  | 0.004466000  |

|   |              |              |              |
|---|--------------|--------------|--------------|
| 6 | 3.619820000  | 1.510070000  | 0.000159000  |
| 6 | 2.394463000  | 0.752229000  | -0.002239000 |
| 6 | 1.153016000  | 1.385372000  | -0.005662000 |
| 6 | -0.029556000 | 0.614545000  | -0.007712000 |
| 6 | -1.393738000 | 1.012809000  | -0.006422000 |
| 6 | -2.119315000 | 2.207014000  | -0.001008000 |
| 6 | -3.498415000 | 2.087846000  | 0.006345000  |
| 6 | -4.200944000 | 0.866937000  | 0.008687000  |
| 6 | -3.512791000 | -0.349899000 | 0.003053000  |
| 6 | -2.110758000 | -0.210878000 | -0.005330000 |
| 1 | -2.938340000 | -2.265383000 | 0.001274000  |
| 1 | 1.375939000  | -2.552320000 | -0.000635000 |
| 1 | 3.845913000  | -2.371016000 | 0.006945000  |
| 1 | 5.861319000  | -1.012173000 | 0.011164000  |
| 1 | 5.721409000  | 1.467731000  | 0.006099000  |
| 1 | 3.559459000  | 2.583997000  | -0.001915000 |
| 1 | 1.101280000  | 2.460405000  | -0.006648000 |
| 1 | -1.652116000 | 3.173488000  | -0.002252000 |
| 1 | -4.083576000 | 2.990246000  | 0.010525000  |
| 1 | -5.276508000 | 0.872638000  | 0.015074000  |

**S<sub>CT</sub>(<sup>1</sup>ππ\*)-K**

|   |              |              |              |
|---|--------------|--------------|--------------|
| 8 | 1.574508000  | 2.655254000  | 0.002846000  |
| 8 | 4.158244000  | 1.452929000  | -0.000164000 |
| 6 | 1.235305000  | 1.388279000  | -0.000540000 |
| 6 | -0.111746000 | 0.865428000  | -0.002141000 |
| 6 | -1.325520000 | 1.464762000  | -0.002011000 |
| 6 | -2.503611000 | 0.655434000  | -0.000468000 |
| 6 | -3.800542000 | 1.243923000  | 0.000385000  |
| 6 | -4.917035000 | 0.476278000  | 0.001386000  |
| 6 | -4.810969000 | -0.941686000 | 0.001758000  |
| 6 | -3.577511000 | -1.533813000 | 0.001033000  |
| 6 | -2.391505000 | -0.743845000 | -0.000016000 |
| 6 | -1.094253000 | -1.350864000 | -0.000350000 |
| 6 | 0.002506000  | -0.566104000 | -0.001406000 |
| 6 | 1.450277000  | -0.898936000 | -0.001410000 |
| 6 | 2.114097000  | -2.194891000 | -0.000673000 |
| 6 | 3.455024000  | -2.175259000 | 0.000408000  |
| 6 | 4.218038000  | -0.930389000 | 0.001375000  |
| 6 | 3.590008000  | 0.355220000  | 0.001006000  |
| 6 | 2.166074000  | 0.274792000  | -0.001374000 |
| 1 | 2.554324000  | 2.698431000  | 0.005625000  |
| 1 | -1.414873000 | 2.535311000  | -0.001569000 |
| 1 | -3.879971000 | 2.316759000  | -0.000087000 |



|   |              |              |              |
|---|--------------|--------------|--------------|
| 1 | -5.888601000 | 0.936549000  | 0.001929000  |
| 1 | -5.701023000 | -1.543971000 | 0.002710000  |
| 1 | -3.491149000 | -2.605993000 | 0.001332000  |
| 1 | -1.023086000 | -2.425233000 | -0.000052000 |
| 1 | 1.552677000  | -3.108366000 | -0.001672000 |
| 1 | 4.006449000  | -3.099534000 | 0.000733000  |
| 1 | 5.292132000  | -0.964825000 | 0.003250000  |

**Section 5-2, Cartesian coordinates of the optimized structures for *meta*-CF<sub>3</sub>-HBFO along ESPT reaction pathway in S<sub>CT</sub>(<sup>1</sup>ππ\*) state at the CAS(12e/10o)/6-31G\* level of theory.**

**S<sub>CT</sub>(<sup>1</sup>ππ\*)-E**

|   |              |              |              |
|---|--------------|--------------|--------------|
| 8 | -0.415401000 | 3.437656000  | -0.017403000 |
| 8 | 2.374462000  | 3.175858000  | -0.001046000 |
| 6 | -0.380972000 | 2.204527000  | -0.005196000 |
| 6 | -1.455560000 | 1.239770000  | 0.004733000  |
| 6 | -2.821671000 | 1.393512000  | 0.006556000  |
| 6 | -3.658540000 | 0.240774000  | 0.006372000  |
| 6 | -5.068987000 | 0.363192000  | 0.016243000  |
| 6 | -5.868836000 | -0.737805000 | 0.012811000  |
| 6 | -5.313586000 | -2.047943000 | -0.001741000 |
| 6 | -3.971640000 | -2.211410000 | -0.010286000 |
| 6 | -3.094030000 | -1.080400000 | -0.004761000 |
| 6 | -1.710175000 | -1.247189000 | -0.006853000 |
| 6 | -0.878873000 | -0.113714000 | -0.004104000 |
| 6 | 0.525070000  | 0.003954000  | -0.004110000 |
| 6 | 1.574771000  | -0.944058000 | -0.021847000 |
| 6 | 2.869857000  | -0.456593000 | -0.041512000 |
| 6 | 3.147744000  | 0.942216000  | -0.035177000 |
| 6 | 2.131390000  | 1.866686000  | -0.013242000 |
| 6 | 0.811368000  | 1.396123000  | -0.003948000 |
| 1 | 1.507156000  | 3.628292000  | 0.027278000  |
| 1 | -3.254783000 | 2.374400000  | 0.011910000  |
| 1 | -5.499853000 | 1.348324000  | 0.025742000  |
| 1 | -6.938725000 | -0.621121000 | 0.019284000  |
| 1 | -5.967906000 | -2.900253000 | -0.004033000 |
| 1 | -3.540164000 | -3.197174000 | -0.019498000 |
| 1 | -1.286870000 | -2.238080000 | -0.015063000 |
| 1 | 1.384836000  | -2.000558000 | -0.025384000 |
| 1 | 4.166378000  | 1.284707000  | -0.048725000 |
| 6 | 4.017983000  | -1.420818000 | 0.003992000  |
| 9 | 3.732530000  | -2.553482000 | -0.622684000 |
| 9 | 5.106652000  | -0.922675000 | -0.556597000 |
| 9 | 4.341682000  | -1.746553000 | 1.248015000  |

**S<sub>CT</sub>(<sup>1</sup>ππ\*)-1.20(ESIPT)**

|   |              |              |              |
|---|--------------|--------------|--------------|
| 8 | -0.229863000 | 3.374445000  | 0.006864000  |
| 8 | 2.146353000  | 3.162723000  | -0.000203000 |
| 6 | -0.347690000 | 2.116277000  | 0.006183000  |
| 6 | -1.451850000 | 1.211274000  | 0.006452000  |
| 6 | -2.816905000 | 1.388106000  | 0.007725000  |
| 6 | -3.672354000 | 0.251208000  | 0.004048000  |
| 6 | -5.080298000 | 0.399563000  | 0.007053000  |
| 6 | -5.900239000 | -0.686524000 | -0.001330000 |
| 6 | -5.368564000 | -2.004958000 | -0.011726000 |
| 6 | -4.028695000 | -2.192809000 | -0.013480000 |
| 6 | -3.132079000 | -1.079385000 | -0.007751000 |
| 6 | -1.748187000 | -1.275227000 | -0.008917000 |
| 6 | -0.893061000 | -0.168695000 | -0.003763000 |
| 6 | 0.518810000  | -0.085600000 | -0.000607000 |
| 6 | 1.602359000  | -1.002829000 | -0.008534000 |
| 6 | 2.873739000  | -0.456081000 | -0.017252000 |
| 6 | 3.131364000  | 0.952746000  | -0.014146000 |
| 6 | 2.086277000  | 1.858639000  | -0.001766000 |
| 6 | 0.806125000  | 1.292879000  | 0.002051000  |
| 1 | 0.966894000  | 3.462527000  | 0.003231000  |
| 1 | -3.235158000 | 2.374446000  | 0.013402000  |
| 1 | -5.492774000 | 1.392415000  | 0.014429000  |
| 1 | -6.967738000 | -0.550279000 | -0.000094000 |
| 1 | -6.037658000 | -2.845648000 | -0.017894000 |
| 1 | -3.615517000 | -3.186253000 | -0.020771000 |
| 1 | -1.347474000 | -2.275601000 | -0.014725000 |
| 1 | 1.458756000  | -2.065387000 | -0.011657000 |
| 1 | 4.148298000  | 1.304248000  | -0.025422000 |
| 6 | 4.072049000  | -1.360731000 | -0.001674000 |
| 9 | 3.742983000  | -2.632023000 | -0.175084000 |
| 9 | 4.934917000  | -1.045850000 | -0.954261000 |
| 9 | 4.727717000  | -1.282959000 | 1.146750000  |

**S<sub>CT</sub>(<sup>1</sup>ππ\*)-K**

|   |              |              |              |
|---|--------------|--------------|--------------|
| 8 | 0.503703000  | 3.420911000  | 0.023617000  |
| 8 | -2.307921000 | 3.172664000  | 0.023426000  |
| 6 | 0.405861000  | 2.122851000  | -0.004065000 |
| 6 | 1.477912000  | 1.193509000  | -0.005896000 |
| 6 | 2.835942000  | 1.353934000  | -0.010232000 |
| 6 | 3.672542000  | 0.207306000  | -0.008384000 |
| 6 | 5.095733000  | 0.335063000  | -0.009422000 |
| 6 | 5.899082000  | -0.776863000 | -0.003261000 |
| 6 | 5.320225000  | -2.071503000 | 0.002338000  |

|   |              |              |              |
|---|--------------|--------------|--------------|
| 6 | 3.953505000  | -2.216717000 | 0.006371000  |
| 6 | 3.101164000  | -1.078284000 | 0.005226000  |
| 6 | 1.673830000  | -1.224638000 | 0.007254000  |
| 6 | 0.895190000  | -0.125593000 | 0.001365000  |
| 6 | -0.572482000 | 0.048418000  | -0.004491000 |
| 6 | -1.656917000 | -0.909898000 | 0.006376000  |
| 6 | -2.924295000 | -0.408799000 | -0.014584000 |
| 6 | -3.206060000 | 0.979105000  | -0.017260000 |
| 6 | -2.161544000 | 1.942856000  | -0.003376000 |
| 6 | -0.837775000 | 1.383436000  | -0.007808000 |
| 1 | -0.406467000 | 3.787456000  | 0.006470000  |
| 1 | 3.276130000  | 2.334495000  | -0.015178000 |
| 1 | 5.528788000  | 1.319345000  | -0.014323000 |
| 1 | 6.968495000  | -0.669487000 | -0.004383000 |
| 1 | 5.953556000  | -2.939562000 | 0.004536000  |
| 1 | 3.513661000  | -3.197993000 | 0.010027000  |
| 1 | 1.255103000  | -2.216256000 | 0.008241000  |
| 1 | -1.470922000 | -1.966960000 | 0.013399000  |
| 1 | -4.217634000 | 1.332521000  | -0.029067000 |
| 6 | -4.064230000 | -1.399190000 | 0.005434000  |
| 9 | -4.001775000 | -2.182455000 | 1.071551000  |
| 9 | -5.245093000 | -0.811763000 | 0.017702000  |
| 9 | -4.029609000 | -2.194691000 | -1.053038000 |

**Section 5-3, Cartesian coordinates of the optimized structures for *meta*-NH<sub>2</sub>-HBFO along ESIPT reaction pathway in S<sub>CT</sub>(<sup>1</sup>ππ\*) state at the CAS(12e/10o)/6-31G\* level of theory.**

**S<sub>CT</sub>(<sup>1</sup>ππ\*)-E**

|   |              |              |              |
|---|--------------|--------------|--------------|
| 8 | 1.009474000  | 2.952298000  | 0.011678000  |
| 8 | 3.728616000  | 2.088265000  | -0.004045000 |
| 6 | 0.790206000  | 1.738397000  | 0.006667000  |
| 6 | -0.439280000 | 1.007767000  | 0.003606000  |
| 6 | -1.749195000 | 1.475298000  | 0.002990000  |
| 6 | -2.805145000 | 0.571413000  | 0.001793000  |
| 6 | -4.167195000 | 1.023967000  | 0.000399000  |
| 6 | -5.195214000 | 0.150010000  | -0.002950000 |
| 6 | -4.961176000 | -1.262117000 | -0.002681000 |
| 6 | -3.699159000 | -1.737544000 | 0.000194000  |
| 6 | -2.572644000 | -0.852819000 | 0.000281000  |
| 6 | -1.269354000 | -1.338800000 | 0.001193000  |
| 6 | -0.192097000 | -0.435333000 | -0.000984000 |
| 6 | 1.189507000  | -0.653974000 | -0.002349000 |
| 6 | 2.028275000  | -1.763445000 | 0.004129000  |
| 6 | 3.403283000  | -1.550869000 | -0.000164000 |

|   |              |              |              |
|---|--------------|--------------|--------------|
| 6 | 4.005629000  | -0.240944000 | -0.007360000 |
| 6 | 3.226783000  | 0.867443000  | -0.003873000 |
| 6 | 1.800537000  | 0.694741000  | -0.000282000 |
| 1 | 2.992651000  | 2.738545000  | 0.005318000  |
| 1 | -1.937464000 | 2.531026000  | 0.003352000  |
| 1 | -4.350540000 | 2.083402000  | 0.000694000  |
| 1 | -6.208201000 | 0.512175000  | -0.004996000 |
| 1 | -5.798398000 | -1.935162000 | -0.004008000 |
| 1 | -3.515018000 | -2.797579000 | 0.001299000  |
| 1 | -1.092977000 | -2.400495000 | -0.001031000 |
| 1 | 1.643280000  | -2.766360000 | 0.002432000  |
| 1 | 5.075778000  | -0.148791000 | -0.022321000 |
| 7 | 4.253582000  | -2.610645000 | -0.031020000 |
| 1 | 3.896594000  | -3.514409000 | 0.188514000  |
| 1 | 5.207339000  | -2.465178000 | 0.216252000  |

**S<sub>CT</sub>(<sup>1</sup>ππ\*)-1.28(maximum)**

|   |              |              |              |
|---|--------------|--------------|--------------|
| 8 | 1.072493000  | 2.924015000  | -0.018046000 |
| 8 | 3.660171000  | 2.104588000  | 0.013172000  |
| 6 | 0.798737000  | 1.705365000  | -0.008477000 |
| 6 | -0.434033000 | 1.009108000  | -0.002290000 |
| 6 | -1.743561000 | 1.484585000  | -0.000171000 |
| 6 | -2.806404000 | 0.581201000  | 0.000893000  |
| 6 | -4.164855000 | 1.035624000  | 0.004543000  |
| 6 | -5.194403000 | 0.161144000  | 0.004288000  |
| 6 | -4.962357000 | -1.249831000 | 0.000085000  |
| 6 | -3.700635000 | -1.727804000 | -0.002611000 |
| 6 | -2.573610000 | -0.844360000 | -0.001899000 |
| 6 | -1.270846000 | -1.333372000 | -0.003328000 |
| 6 | -0.191697000 | -0.437984000 | -0.001762000 |
| 6 | 1.195594000  | -0.672949000 | 0.001310000  |
| 6 | 2.040650000  | -1.774038000 | 0.006376000  |
| 6 | 3.419233000  | -1.543856000 | 0.008885000  |
| 6 | 4.010147000  | -0.234224000 | 0.012953000  |
| 6 | 3.220409000  | 0.877011000  | 0.009511000  |
| 6 | 1.799635000  | 0.663241000  | 0.001719000  |
| 1 | 2.616071000  | 2.844714000  | -0.008480000 |
| 1 | -1.930303000 | 2.539193000  | -0.001181000 |
| 1 | -4.346951000 | 2.095194000  | 0.007540000  |
| 1 | -6.207335000 | 0.524310000  | 0.006905000  |
| 1 | -5.801085000 | -1.921215000 | -0.000851000 |
| 1 | -3.516557000 | -2.787740000 | -0.005545000 |
| 1 | -1.098131000 | -2.395107000 | -0.003802000 |
| 1 | 1.667311000  | -2.781214000 | 0.000300000  |

|   |             |              |              |
|---|-------------|--------------|--------------|
| 1 | 5.080089000 | -0.135506000 | 0.007509000  |
| 7 | 4.272949000 | -2.598504000 | -0.021023000 |
| 1 | 3.922947000 | -3.511470000 | 0.164006000  |
| 1 | 5.232798000 | -2.453406000 | 0.196321000  |

$S_{CT}(^1\pi\pi^*)-K$

|   |              |              |              |
|---|--------------|--------------|--------------|
| 8 | 0.978745000  | 2.980212000  | 0.004328000  |
| 8 | 3.730296000  | 2.061828000  | -0.010912000 |
| 6 | 0.812622000  | 1.669473000  | 0.002520000  |
| 6 | -0.456069000 | 1.005657000  | 0.001436000  |
| 6 | -1.739552000 | 1.469679000  | 0.002169000  |
| 6 | -2.811679000 | 0.543621000  | 0.001535000  |
| 6 | -4.176699000 | 0.993478000  | 0.001383000  |
| 6 | -5.211815000 | 0.101147000  | 0.000384000  |
| 6 | -4.949315000 | -1.302302000 | -0.001199000 |
| 6 | -3.658622000 | -1.756814000 | -0.001716000 |
| 6 | -2.554366000 | -0.840386000 | -0.000857000 |
| 6 | -1.211844000 | -1.305468000 | -0.000577000 |
| 6 | -0.194973000 | -0.406085000 | -0.000825000 |
| 6 | 1.257054000  | -0.573006000 | -0.002310000 |
| 6 | 2.031466000  | -1.759373000 | -0.001963000 |
| 6 | 3.392816000  | -1.606225000 | -0.002642000 |
| 6 | 4.004466000  | -0.268144000 | -0.008053000 |
| 6 | 3.232286000  | 0.938529000  | 0.013876000  |
| 6 | 1.812512000  | 0.714465000  | 0.004610000  |
| 1 | 1.937897000  | 3.146148000  | 0.006382000  |
| 1 | -1.945006000 | 2.523627000  | 0.003048000  |
| 1 | -4.368566000 | 2.051647000  | 0.002095000  |
| 1 | -6.228059000 | 0.451145000  | 0.000511000  |
| 1 | -5.771013000 | -1.994428000 | -0.002177000 |
| 1 | -3.451062000 | -2.812454000 | -0.003274000 |
| 1 | -1.025658000 | -2.365371000 | -0.002285000 |
| 1 | 1.573396000  | -2.727946000 | -0.002070000 |
| 1 | 5.081657000  | -0.180419000 | -0.041059000 |
| 7 | 4.250563000  | -2.649603000 | -0.032707000 |
| 1 | 3.900029000  | -3.571096000 | 0.117800000  |
| 1 | 5.211307000  | -2.511709000 | 0.189706000  |

**Section 5-4, Cartesian coordinates of the optimized structures for *para*-CF<sub>3</sub>-HBFO along ES IPT reaction pathway in S<sub>CT</sub>(<sup>1</sup>ππ\*) state at the CAS(12e/10o)/6-31G\* level of theory.**

**S<sub>CT</sub>(<sup>1</sup>ππ\*)-E**

|   |              |              |              |
|---|--------------|--------------|--------------|
| 8 | -0.592431446 | 3.599647928  | -0.000282693 |
| 8 | -3.380818091 | 3.024846218  | -0.000171593 |
| 6 | -0.496428301 | 2.367270804  | -0.000199439 |
| 6 | 0.668924181  | 1.536181297  | -0.000151116 |
| 6 | 2.004067475  | 1.875469714  | -0.000201368 |
| 6 | 2.984784812  | 0.853990266  | -0.000132941 |
| 6 | 4.371695436  | 1.159066782  | -0.000180320 |
| 6 | 5.304430674  | 0.173237161  | -0.000111144 |
| 6 | 4.921639897  | -1.201059372 | 0.000011050  |
| 6 | 3.614421086  | -1.536576280 | 0.000059722  |
| 6 | 2.593960368  | -0.528757761 | -0.000009854 |
| 6 | 1.248628380  | -0.883804017 | 0.000043429  |
| 6 | 0.262181601  | 0.118945864  | -0.000025809 |
| 6 | -1.154847239 | 0.066628065  | 0.000011172  |
| 6 | -2.125427562 | -0.979240144 | 0.000123561  |
| 6 | -3.440753754 | -0.636898713 | 0.000142812  |
| 6 | -3.879941465 | 0.718896172  | 0.000048043  |
| 6 | -2.966662005 | 1.758943397  | -0.000071370 |
| 6 | -1.596612529 | 1.427295950  | -0.000086979 |
| 1 | -2.595771609 | 3.609176723  | -0.000266059 |
| 1 | 2.290374423  | 2.908593877  | -0.000291791 |
| 1 | 4.668579822  | 2.192568026  | -0.000271660 |
| 1 | 6.350839472  | 0.424544796  | -0.000147927 |
| 1 | 5.682219414  | -1.960063111 | 0.000064044  |
| 1 | 3.312477189  | -2.569207234 | 0.000152506  |
| 1 | 0.983843854  | -1.922801354 | 0.000139256  |
| 1 | -4.183947428 | -1.409834847 | 0.000228721  |
| 1 | -4.932450724 | 0.939481973  | 0.000063217  |
| 6 | -1.739016529 | -2.427494874 | 0.000226277  |
| 9 | -2.788222944 | -3.226755068 | 0.000332008  |
| 9 | -1.008091867 | -2.741034405 | 1.064346213  |
| 9 | -1.008178007 | -2.741208065 | -1.063901593 |

**S<sub>CT</sub>(<sup>1</sup>ππ\*)-1.22(maximum)**

|   |              |             |              |
|---|--------------|-------------|--------------|
| 8 | -0.614087993 | 3.591863186 | 0.000069926  |
| 8 | -3.316589870 | 3.054304547 | -0.000411367 |
| 6 | -0.491597702 | 2.353213528 | -0.000072358 |
| 6 | 0.674206614  | 1.531315004 | -0.000043792 |
| 6 | 2.010334738  | 1.868928353 | -0.000077720 |
| 6 | 2.989172813  | 0.842717547 | -0.000060920 |

|   |              |              |              |
|---|--------------|--------------|--------------|
| 6 | 4.374891111  | 1.144828448  | -0.000255866 |
| 6 | 5.306203418  | 0.155093609  | -0.000306649 |
| 6 | 4.920058308  | -1.215213477 | -0.000100303 |
| 6 | 3.609642526  | -1.546852976 | 0.000071095  |
| 6 | 2.595736784  | -0.536342007 | 0.000048696  |
| 6 | 1.245700125  | -0.890203442 | 0.000100732  |
| 6 | 0.263282852  | 0.113500672  | -0.000005250 |
| 6 | -1.154933553 | 0.063180005  | -0.000044834 |
| 6 | -2.136797226 | -0.974503336 | 0.000048120  |
| 6 | -3.448074975 | -0.615035321 | -0.000010016 |
| 6 | -3.874549932 | 0.747695745  | -0.000165679 |
| 6 | -2.945331050 | 1.780810652  | -0.000262650 |
| 6 | -1.589210742 | 1.421856860  | -0.000161340 |
| 1 | -2.279382559 | 3.696644959  | -0.000273554 |
| 1 | 2.301481350  | 2.900278217  | -0.000060166 |
| 1 | 4.675802383  | 2.177026810  | -0.000401974 |
| 1 | 6.352805577  | 0.405177936  | -0.000499914 |
| 1 | 5.676654533  | -1.978110294 | -0.000102652 |
| 1 | 3.305983824  | -2.578948207 | 0.000191979  |
| 1 | 0.981094551  | -1.929271604 | 0.000167324  |
| 1 | -4.203460702 | -1.376073688 | 0.000120258  |
| 1 | -4.924300701 | 0.980840667  | -0.000179417 |
| 6 | -1.761946843 | -2.426706738 | 0.000292072  |
| 9 | -2.818057915 | -3.216616164 | 0.000422178  |
| 9 | -1.033286059 | -2.745770123 | 1.063690997  |
| 9 | -1.033320345 | -2.746125423 | -1.063023217 |

$S_{CT}(^1\pi\pi^*)-K$

|   |              |              |              |
|---|--------------|--------------|--------------|
| 8 | 0.480579635  | 3.594735502  | 0.014529937  |
| 8 | 3.228556218  | 3.064392983  | 0.004903050  |
| 6 | 0.437335714  | 2.289493120  | 0.003188458  |
| 6 | -0.721569311 | 1.482856883  | 0.003646644  |
| 6 | -2.053256707 | 1.809783440  | 0.003034055  |
| 6 | -3.021605510 | 0.781444637  | 0.001868775  |
| 6 | -4.423823745 | 1.079135331  | -0.003202388 |
| 6 | -5.351033621 | 0.072066219  | -0.006035161 |
| 6 | -4.929402028 | -1.286380425 | -0.004204856 |
| 6 | -3.592787807 | -1.593422940 | 0.000209781  |
| 6 | -2.607574680 | -0.561614804 | 0.001679676  |
| 6 | -1.214945671 | -0.886202217 | 0.001592794  |
| 6 | -0.295943276 | 0.105805149  | -0.000675062 |
| 6 | 1.191752505  | 0.116706804  | -0.008788074 |
| 6 | 2.210480591  | -0.936581214 | -0.010541311 |

|   |              |              |              |
|---|--------------|--------------|--------------|
| 6 | 3.516913182  | -0.551042255 | -0.010794052 |
| 6 | 3.922120993  | 0.802016937  | -0.011344467 |
| 6 | 2.965744909  | 1.857492415  | -0.010711529 |
| 6 | 1.593424136  | 1.418942194  | -0.013587252 |
| 1 | 1.421962611  | 3.867724466  | 0.010241407  |
| 1 | -2.360752557 | 2.839267472  | 0.003352604  |
| 1 | -4.734026401 | 2.108651913  | -0.004719237 |
| 1 | -6.400483654 | 0.303441221  | -0.010476026 |
| 1 | -5.663013826 | -2.071250405 | -0.004774923 |
| 1 | -3.270428368 | -2.619068733 | 0.003574860  |
| 1 | -0.940436646 | -1.921406840 | -0.001130139 |
| 1 | 4.278135475  | -1.308235292 | -0.006509306 |
| 1 | 4.964819295  | 1.064092801  | 0.000293789  |
| 6 | 1.844794214  | -2.382993374 | 0.003625315  |
| 9 | 2.905929205  | -3.168425256 | 0.019939301  |
| 9 | 1.121521190  | -2.719383319 | -1.060392465 |
| 9 | 1.106704497  | -2.694555857 | 1.064999276  |

**Section 5-5, Cartesian coordinates of the optimized structures for *para*-NH<sub>2</sub>-HBFO along ESIP<sub>T</sub> reaction pathways in S<sub>CT</sub>(<sup>1</sup>ππ\*) state at the CAS(12e/10o)/6-31G\* level of theory.**

**S<sub>CT</sub>(<sup>1</sup>ππ\*)-E**

|   |              |              |              |
|---|--------------|--------------|--------------|
| 8 | 1.396564140  | -2.892266859 | 0.063714285  |
| 8 | 4.073390844  | -1.804841612 | -0.095347877 |
| 6 | 1.104537770  | -1.700506248 | 0.060377721  |
| 6 | -0.197369465 | -1.072751532 | 0.063692413  |
| 6 | -1.466623382 | -1.623302780 | 0.072278722  |
| 6 | -2.616093180 | -0.772229550 | 0.026937834  |
| 6 | -3.922632411 | -1.308583448 | 0.033029881  |
| 6 | -5.018074190 | -0.496064253 | -0.025644061 |
| 6 | -4.871209231 | 0.905591811  | -0.096668941 |
| 6 | -3.625813351 | 1.454655673  | -0.104168590 |
| 6 | -2.468923653 | 0.636866867  | -0.037811658 |
| 6 | -1.174552164 | 1.212318878  | -0.041658742 |
| 6 | -0.036670077 | 0.370226589  | 0.030950577  |
| 6 | 1.334709368  | 0.666116610  | 0.039930581  |
| 6 | 2.067939798  | 1.886174938  | 0.040172675  |
| 6 | 3.468497057  | 1.797501950  | -0.067655691 |
| 6 | 4.112050624  | 0.554075425  | -0.124133659 |
| 6 | 3.408917731  | -0.645018964 | -0.062091657 |
| 6 | 2.029045456  | -0.592960967 | 0.028319477  |
| 1 | 3.419067039  | -2.529554993 | -0.051619409 |
| 1 | -1.588998055 | -2.687876661 | 0.102667691  |



|   |              |              |              |
|---|--------------|--------------|--------------|
| 1 | -4.042453433 | -2.376145011 | 0.082959060  |
| 1 | -6.004362309 | -0.925765640 | -0.020536745 |
| 1 | -5.742950177 | 1.531910418  | -0.146337910 |
| 1 | -3.504153936 | 2.522653024  | -0.160152231 |
| 1 | -1.063873055 | 2.277817771  | -0.135480060 |
| 1 | 4.053616745  | 2.695527505  | -0.081384501 |
| 1 | 5.185529404  | 0.510197303  | -0.196946621 |
| 7 | 1.416713844  | 3.119344855  | 0.118134980  |
| 1 | 2.051061240  | 3.892793746  | 0.120052461  |
| 1 | 0.794459635  | 3.197230385  | 0.897760850  |

**S<sub>CT</sub>(<sup>1</sup>ππ\*)-1.28(maximum)**

|   |              |              |              |
|---|--------------|--------------|--------------|
| 8 | 1.432492306  | -2.869969410 | 0.060726894  |
| 8 | 3.983765766  | -1.849585470 | -0.097936039 |
| 6 | 1.094998234  | -1.672407343 | 0.061022849  |
| 6 | -0.215224043 | -1.062397402 | 0.066599956  |
| 6 | -1.472204990 | -1.617342053 | 0.073207227  |
| 6 | -2.622828320 | -0.765178036 | 0.027456088  |
| 6 | -3.929657202 | -1.298539637 | 0.032346747  |
| 6 | -5.022507796 | -0.481805479 | -0.025647989 |
| 6 | -4.867007982 | 0.917639658  | -0.094984437 |
| 6 | -3.618023952 | 1.462099631  | -0.101976390 |
| 6 | -2.466606846 | 0.640416424  | -0.037749377 |
| 6 | -1.163058339 | 1.209504734  | -0.042985719 |
| 6 | -0.050583020 | 0.381775586  | 0.028562353  |
| 6 | 1.338493610  | 0.665197424  | 0.036087729  |
| 6 | 2.114090003  | 1.889740556  | 0.038488720  |
| 6 | 3.506597856  | 1.777657745  | -0.067915986 |
| 6 | 4.134541329  | 0.519998338  | -0.125581298 |
| 6 | 3.406624071  | -0.667873775 | -0.058631786 |
| 6 | 2.011311356  | -0.575107628 | 0.038036056  |
| 1 | 2.996999816  | -2.662466548 | -0.035350670 |
| 1 | -1.592922412 | -2.682352119 | 0.102067722  |
| 1 | -4.052614964 | -2.365934885 | 0.081888227  |
| 1 | -6.010751965 | -0.906658770 | -0.020642149 |
| 1 | -5.735071521 | 1.549261066  | -0.143428305 |
| 1 | -3.492772513 | 2.529622558  | -0.157026398 |
| 1 | -1.054319437 | 2.275450127  | -0.132803506 |
| 1 | 4.107913331  | 2.665282629  | -0.078812487 |
| 1 | 5.205900786  | 0.457677369  | -0.201445438 |
| 7 | 1.472619791  | 3.123972246  | 0.113484863  |
| 1 | 2.107602565  | 3.895914653  | 0.152586466  |
| 1 | 0.807909448  | 3.192564788  | 0.858237199  |

$S_{CT}(^1\pi\pi^*)-K$

|   |              |              |              |
|---|--------------|--------------|--------------|
| 8 | 1.341339112  | -2.853153210 | 0.041363103  |
| 8 | 4.093851657  | -1.828433038 | -0.057452191 |
| 6 | 1.088758456  | -1.680310299 | 0.031729110  |
| 6 | -0.253460883 | -1.031023461 | 0.043264857  |
| 6 | -1.483560250 | -1.606149811 | 0.047478099  |
| 6 | -2.651247726 | -0.760239521 | 0.018354170  |
| 6 | -3.953869659 | -1.301150926 | 0.026819430  |
| 6 | -5.050838623 | -0.489610165 | -0.009970328 |
| 6 | -4.888845481 | 0.906135022  | -0.058942148 |
| 6 | -3.637694550 | 1.452326198  | -0.068288599 |
| 6 | -2.487476242 | 0.635491292  | -0.028314477 |
| 6 | -1.162728964 | 1.214190054  | -0.033105132 |
| 6 | -0.074101414 | 0.396147997  | 0.012371848  |
| 6 | 1.389720312  | 0.665672472  | 0.009561378  |
| 6 | 2.103514332  | 1.845432899  | 0.020253874  |
| 6 | 3.500503189  | 1.736524448  | -0.023884809 |
| 6 | 4.161517716  | 0.527862067  | -0.066100744 |
| 6 | 3.436516320  | -0.662842760 | -0.039579802 |
| 6 | 2.060331822  | -0.566873312 | 0.003404826  |
| 1 | 3.456794122  | -2.559206340 | -0.034296362 |
| 1 | -1.590123996 | -2.676020143 | 0.065538785  |
| 1 | -4.069922574 | -2.370212998 | 0.062525857  |
| 1 | -6.039711349 | -0.911268581 | -0.002904909 |
| 1 | -5.756220672 | 1.540993233  | -0.089665516 |
| 1 | -3.514161545 | 2.520435189  | -0.107264737 |
| 1 | -1.064377175 | 2.280812745  | -0.096947610 |
| 1 | 4.086619550  | 2.640010589  | -0.025284983 |
| 1 | 5.234081158  | 0.489280982  | -0.103530357 |
| 7 | 1.459138858  | 3.103712366  | 0.039596283  |
| 1 | 2.108727077  | 3.862314856  | 0.010033283  |
| 1 | 0.870567109  | 3.220070696  | 0.863025947  |
